# Supplementary material
Source: Research Square preprint supplement (doi:10.21203/rs.3.rs-10014553/v1)
Supplement: Supplementary file 1 [file 7aabe57846cde12a2947344d.docx]

**Supplementary Information**


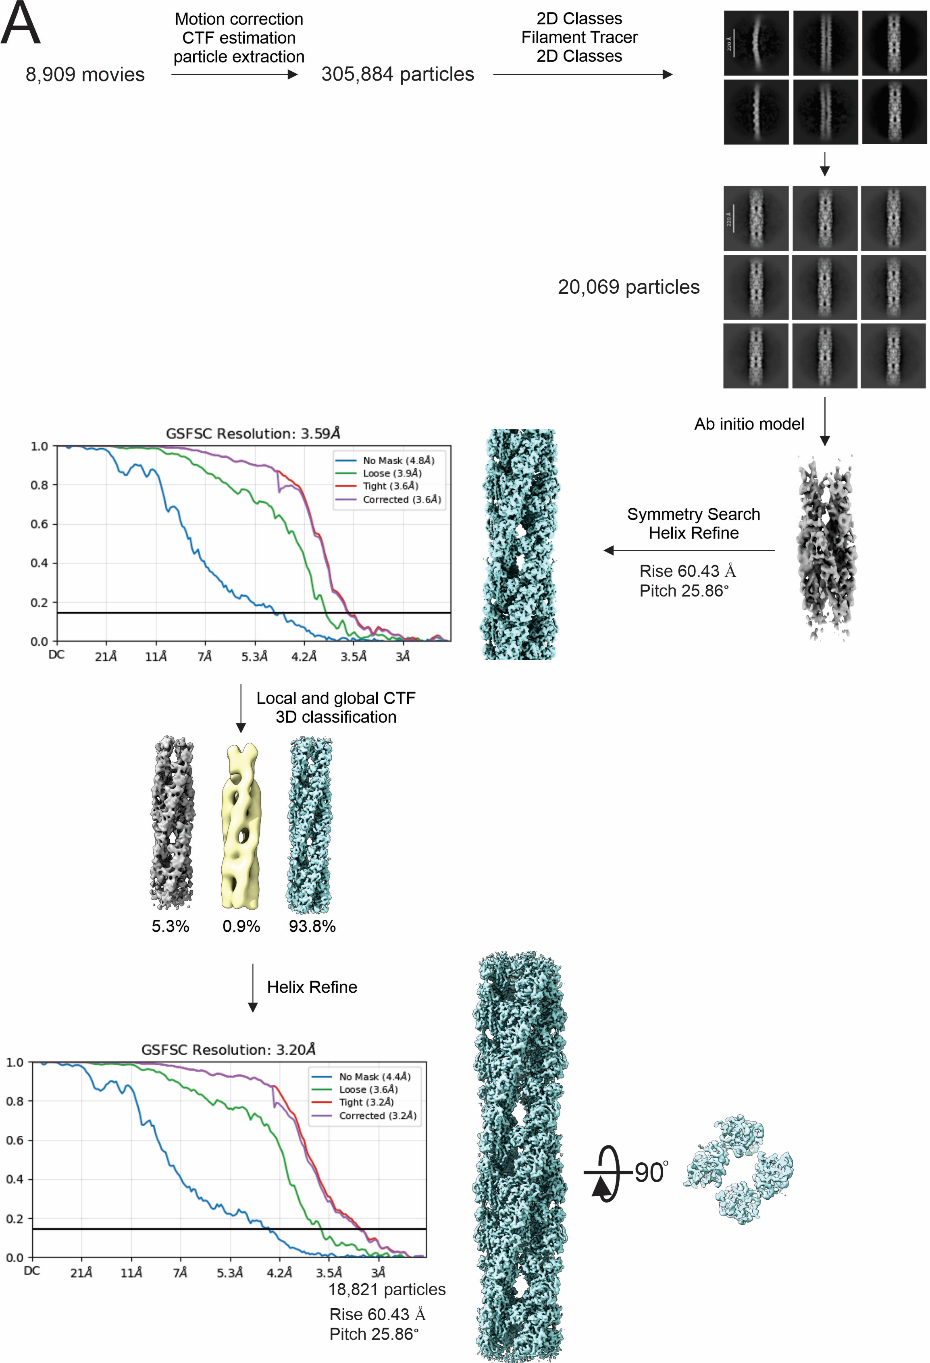


**Supplementary Figure 1: Cryo-EM and single particle analysis workflow**

| **Supplementary Table 1: Cryo-EM statistics** | |
| --- | --- |
|  | **Ffp1 filament** |
| **PDB 9Y6O/ EMD-72625** |
| **Data collection** |  |
| Microscope | FEI Titan Krios |
| Voltage (kV) | 300 |
| Camera | Gatan K3 Continuum |
| Mode | Counting |
| Magnification | 64,000 |
| Pixel size (Å) | 1.32 |
| Electron dose (e–/Å2) | 54 |
| Defocus range (μm) | -0.6 to -2.0 |
| Exposure (s) | 5.3 |
|  |  |
| **Reconstruction** |  |
| Software | CryoSPARC-4.1.1 |
| Frames | 40 |
| Symmetry | C33 |
| Initial particle images (no.) | 305,884 |
| Final particle images (no.) | 18,821 |
| Map resolution, FSC0.143 (Å) | 3.20 |
| Map-sharpening B factor (Å) | -60.7 |
|  |  |
| **Refinement** |  |
| Software | Phenix-1.20.1 |
|  |  |
|  |  |
| **Model composition** |  |
| Non-hydrogen atoms | 3310 |
| Protein residues | 426 |
|  |  |
| **R.m.s. deviations** |  |
| Bond lengths (Å) | 0.005 |
| Bond angles (°) | 0.771 |
|  |  |
| **Validation** |  |
| MolProbity score | 1.67 |
| Clashscore | 7.92 |
| Poor rotamers (%) | 0 |
|  |  |
| **Ramachandran plot** |  |
| Favored (%) | 96.46 |
| Allowed (%) | 3.54 |
| Disallowed (%) | 0 |

**Supplementary Table 2: List of primers used in this study**

**Supplementary Figure 2: Abundance of FimA, Mfa1 and Ffp1 in 33277 *P. gingivalis* cells**

*P. gingivalis* 33277 WT cells were lysed and electrophoresed on a gel for a short time. The whole proteome was excised as a single band from the gel and subjected to trypsin digestion and mass spectrometry analysis. MS/MS spectra were analyzed using Maxquant software and the iBAQ intensities were plotted for PGN_0180 (FimA), PGN_0287 (Mfa1) and PGN_1808 (Ffp1).


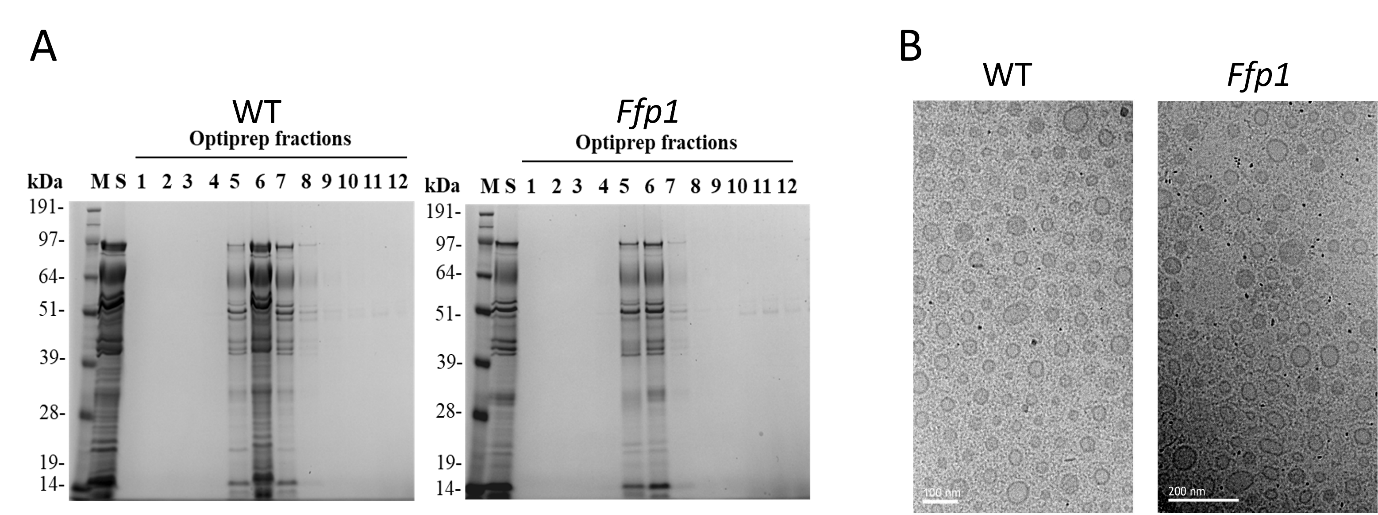


**Supplementary Figure 3: Quantitation of OMVs**

(A) Twelve fractions obtained by OptiPrep density‑gradient centrifugation of OMVs from wild‑type (WT) and the *ΔFfp1* mutant (*Ffp1*) were separated by SDS–PAGE to compare protein distribution and amount across fractions (B) Representative cryo‑electron micrographs of purified OMVs from WT and *ΔFfp1*. Scale bars: WT, 100 nm; *ΔFfp1*, 200 nm.
